# Supplementary material for: Multi-omics Insights into PDHA1 as a Predictive Biomarker for Prognosis, Immunotherapy Efficacy, and Drug Sensitivity in Hepatocellular Carcinoma
Source: PubMed Central journal article supplement — ACS Omega. 2024 Nov 10;9(46):46492–504. doi: 10.1021/acsomega.4c08010 (PMC11579764; doi:10.1021/acsomega.4c08010), 2024-11-10
Supplement: ao4c08010_si_001.pdf [file ao4c08010_si_001.pdf]

Muti-omics insights into PDHA1 as a predictive biomarker for prognosis, immunotherapy efficacy, and drug sensitivity in hepatocellular carcinoma

Yong Pan<sup>1,2</sup>, Yiru Zhang<sup>2</sup>, Daiwen Mao<sup>1</sup>, Zhou Fang<sup>1</sup>, Yingqiu Ma<sup>1</sup>, Danwen Jin<sup>3</sup>, Shibo Li<sup>1\*</sup>

1 Department of Infectious Diseases, Zhoushan Hospital, Wenzhou Medical University, Zhoushan, China

2 State Key Laboratory for the Diagnosis and Treatment of Infectious Diseases, The First Affiliated Hospital of Zhejiang University, Hangzhou, China

3 Pathological Diagnosis Center, Zhoushan Hospital, Wenzhou Medical University, Zhoushan, China

**Corresponding author:**

Shibo Li

Department of Infectious Diseases, Zhoushan Hospital, Wenzhou Medical University, Zhoushan, China. lsb0398@126.com

**Table S1** Baseline characteristics of the patients in TCGA cohort.

| <b>characteristics</b> | <b>TCGA-LIHC cohort</b> |
|------------------------|-------------------------|
| Number of patients     | 374                     |
| Gender (%)             |                         |
| Female                 | 121(32.4)               |
| Male                   | 253(67.6)               |
| Age (median, range)    | 61(16-90)               |
| Tumor grade (%)        |                         |
| G1+G2                  | 233(62.3)               |
| G3+G4                  | 136(36.4)               |
| Unknown                | 5(1.3)                  |
| Stage (%)              |                         |
| I+II                   | 260(69.5)               |
| III+IV                 | 90(24.1)                |
| Unknown                | 24(6.4)                 |
| AFP (%)                |                         |

|                       |           |
|-----------------------|-----------|
| ≤400ng/L              | 215(57.5) |
| > 400ng/L             | 65(17.4)  |
| Unknown               | 94(25.1)  |
| Vascular Invasion (%) |           |
| Yes                   | 110(29.4) |
| No                    | 208(55.6) |
| Unknown               | 56(15.0)  |

**Table S2** The detailed information of enriched terms by GSEA.

| ID                                     | setSize | enrichmentScore | NES         | pvalue     | p.adjust   | qvalue     | rank | leading_edge                         |
|----------------------------------------|---------|-----------------|-------------|------------|------------|------------|------|--------------------------------------|
| REACTOME_BIOLOGICAL_OXIDATIONS         | 15      | -0.44549975     | -2.02623259 | 0.00744734 | 0.10612466 | 0.08427258 | 121  | tags=53%,<br>list=14%,<br>signal=47% |
| REACTOME_CELLULAR_RESPONSES_TO_STIMULI | 16      | -0.41944866     | -1.99498031 | 0.00566199 | 0.10612466 | 0.08427258 | 140  | tags=62%,<br>list=16%,<br>signal=54% |

|                                                                       |    |             |             |            |            |            |     |                                      |
|-----------------------------------------------------------------------|----|-------------|-------------|------------|------------|------------|-----|--------------------------------------|
| REACTOME<br>_NERVOUS<br>_SYSTEM_<br>DEVELOPM<br>ENT                   | 21 | 0.43717274  | 1.87930225  | 0.00590846 | 0.10612466 | 0.08427258 | 367 | tags=76%,<br>list=41%,<br>signal=46% |
| REACTOME<br>_NEURONA<br>L_SYSTEM                                      | 30 | 0.38539483  | 1.8745877   | 0.00545236 | 0.10612466 | 0.08427258 | 312 | tags=63%,<br>list=35%,<br>signal=43% |
| REACTOME<br>_EXTRACE<br>LLULAR_M<br>ATRIX_OR<br>GANIZATIO<br>N        | 12 | 0.50831014  | 1.78614752  | 0.01050422 | 0.11974807 | 0.0950908  | 236 | tags=67%,<br>list=26%,<br>signal=50% |
| KEGG_MET<br>ABOLISM_<br>OF_XENOB<br>IOTICS_BY<br>_CYTOCHR<br>OME_P450 | 10 | -0.47390995 | -1.80347701 | 0.01699811 | 0.13110268 | 0.10410739 | 162 | tags=70%,<br>list=18%,<br>signal=58% |
| REACTOME<br>_RNA_POL<br>YMERASE_<br>II_TRANSC<br>RIPTION              | 15 | 0.46391138  | 1.77761094  | 0.01803118 | 0.13110268 | 0.10410739 | 153 | tags=53%,<br>list=17%,<br>signal=45% |
| REACTOME                                                              | 37 | 0.33254128  | 1.75863591  | 0.01840038 | 0.13110268 | 0.10410739 | 367 | tags=65%,                            |

|                                                                                            |    |             |             |            |            |            |     |                                      |
|--------------------------------------------------------------------------------------------|----|-------------|-------------|------------|------------|------------|-----|--------------------------------------|
| _DEVELOP<br>MENTAL_B<br>IOLOGY                                                             |    |             |             |            |            |            |     | list=41%,<br>signal=40%              |
| WP_METAP<br>ATHWAY_<br>BIOTRANS<br>FORMATIO<br>N_PHASE_I<br>_AND_II                        | 16 | -0.37627795 | -1.78965189 | 0.02070679 | 0.13114302 | 0.10413942 | 121 | tags=50%,<br>list=14%,<br>signal=44% |
| REACTOME<br>_TRANSMI<br>SSION_ACR<br>OSS_CHEM<br>ICAL_SYN<br>APSES                         | 19 | 0.3980214   | 1.66360856  | 0.03891066 | 0.17916793 | 0.14227555 | 299 | tags=63%,<br>list=33%,<br>signal=43% |
| REACTOME<br>_BINDING_<br>_AND_UPTA<br>KE_OF_LIG<br>ANDS_BY_<br>SCAVENGE<br>R_RECEPT<br>ORS | 10 | -0.43026828 | -1.63739747 | 0.03996969 | 0.17916793 | 0.14227555 | 401 | tags=90%,<br>list=45%,<br>signal=50% |
| REACTOME<br>_METABOL<br>ISM_OF_LI                                                          | 24 | -0.28458461 | -1.62416765 | 0.03633342 | 0.17916793 | 0.14227555 | 121 | tags=33%,<br>list=14%,<br>signal=30% |

|                         |    |            |             |            |            |            |     |                                       |
|-------------------------|----|------------|-------------|------------|------------|------------|-----|---------------------------------------|
| PIDS                    |    |            |             |            |            |            |     |                                       |
| KEGG_PATHWAYS_IN_CANCER | 10 | -0.4259887 | -1.62111141 | 0.04086286 | 0.17916793 | 0.14227555 | 519 | tags=100%,<br>list=58%,<br>signal=42% |

**Table S3** P value and correlation coefficient of the top 10 related genes.

| id                 | Correlation<br>pearson | P value<br>pearson | P adj<br>pearson | Correlation<br>spearman | P value<br>spearman | P adj<br>spearman | Gene name | Gene type      |
|--------------------|------------------------|--------------------|------------------|-------------------------|---------------------|-------------------|-----------|----------------|
| ENSG00000184831.14 | 0.759068399            | 8.93424e-71        | 2.51356e-66      | 0.726308641             | 0                   | 0                 | APOO      | Protein coding |
| ENSG00000004961.15 | 0.670670857            | 8.24781e-50        | 1.54696e-45      | 0.664533675             | 1.27309e-48         | 2.06438e-46       | HCCS      | Protein coding |
| ENSG00000110955.9  | 0.660356175            | 7.9043e-48         | 1.1119e-43       | 0.635635209             | 0                   | 0                 | ATP5F1B   | Protein coding |
| ENSG00000102054.18 | 0.624387173            | 1.70881e-41        | 1.92303e-37      | 0.615732827             | 0                   | 0                 | RBBP7     | Protein coding |
| ENSG00000130985.17 | 0.62024254             | 8.1311e-41         | 7.62534e-37      | 0.607709788             | 0                   | 0                 | UBA1      | Protein coding |
| ENSG00000069509.6  | 0.609970558            | 3.51761e-39        | 2.82755e-35      | 0.584970789             | 1.94184e-35         | 3.13975e-33       | FUNDC1    | Protein coding |
| ENSG00000132305.21 | 0.607929527            | 7.31563e-39        | 4.57373e-35      | 0.58246122              | 0                   | 0                 | IMMT      | Protein coding |
| ENSG00000182220.15 | 0.580460635            | 8.49653e-35        | 3.98402e-31      | 0.573317949             | 0                   | 0                 | ATP6AP2   | Protein coding |
| ENSG00000152234.1  | 0.60925001             | 4.55801e-39        | 3.20588e-35      | 0.569459295             | 0                   | 0                 | ATP5F1A   | Protein        |

|                   |            |             |             |             |   |   |      |                |
|-------------------|------------|-------------|-------------|-------------|---|---|------|----------------|
| 6                 | 8          |             |             |             |   |   |      | coding         |
| ENSG00000102144.1 | 0.56718816 | 5.74131e-33 | 2.15368e-29 | 0.564592268 | 0 | 0 | PGK1 | Protein coding |
| 5                 | 8          |             |             |             |   |   |      |                |
